# Supplementary material for: Reinforcing pomelo peel pectin beads with l-glutamate-modified graphene oxide for high-stability BOD biosensing
Source: Royal Society of Chemistry journal article supplement (doi:10.1039/d6ra00695g), 2026-04-20
Supplement: d6ra00695g1.pdf [file d6ra00695g1.pdf]

## Supplementary Material

**Table S 1.** Water content and swelling of composite bead in PBS in Figure 5a

| Composite bead | Water content, g/g | Swelling %SD2, % | Swelling %SD4, % |
|----------------|--------------------|------------------|------------------|
| Blank          | 0.910 ± 0.025      | 111 ± 0.59       | 92 ± 0.63        |
| Pec-0.1GO      | 0.915 ± 0.018      | 105 ± 0.22       | 42 ± 0.38        |
| Pec-0.05GluGO  | 0.956 ± 0.013      | 142 ± 0.26       | 116 ± 0.33       |
| Pec-0.1GluGO   | 0.960 ± 0.010      | 227 ± 0.21       | -                |
| Pec-0.2GluGO   | 0.960 ± 0.016      | 223 ± 0.47       | -                |

**Table S 2.** Stability of pectin-based composite beads in distilled water and acid acetic 1% in Figure 5b

| Composite bead | Percentage of remaining composite beads in distilled water, % | Percentage of remaining composite beads in acid acetic 1%, % |
|----------------|---------------------------------------------------------------|--------------------------------------------------------------|
| Blank          | 100 ± 1.11                                                    | 83.33 ± 0.56                                                 |
| Pec-0.1GO      | 100 ± 0.83                                                    | 92.22 ± 1.11                                                 |
| Pec-0.05GluGO  | 100 ± 0.67                                                    | 92.22 ± 0.56                                                 |
| Pec-0.1GluGO   | 100 ± 0.56                                                    | 93.33 ± 0.56                                                 |
| Pec-0.2GluGO   | 100 ± 0.56                                                    | 93.33 ± 0.86                                                 |

**Table S 3.** Stability of pectin-based composite beads in OECD in Figure 11b

| Composite bead | Percentage of remaining composite beads in distilled OECD, % |           |           |       |       |       |       |
|----------------|--------------------------------------------------------------|-----------|-----------|-------|-------|-------|-------|
|                | Day 1                                                        | Day 2     | Day 3     | Day 4 | Day 5 | Day 6 | Day 7 |
| Blank          | 0                                                            | 0         | 0         | 0     | 0     | 0     | 0     |
| Pec-0.1GO      | 20 ± 0.67                                                    | 0         | 0         | 0     | 0     | 0     | 0     |
| Pec-0.05GluGO  | 30 ± 0.86                                                    | 10 ± 0.56 | 0         | 0     | 0     | 0     | 0     |
| Pec-0.1GluGO   | 70 ± 0.83                                                    | 50 ± 0.56 | 50 ± 0.83 | 0     | 0     | 0     | 0     |
| Pec-0.2GluGO   | 100 ± 0.83                                                   | 50 ± 1.11 | 50 ± 0.86 | 0     | 0     | 0     | 0     |

**Table S 4.** Stability of pectin-based composite beads in oxytetracycline in Figure 11c

| Composite bead | Percentage of remaining composite beads in distilled oxytetracycline, % |            |            |            |            |            |           |
|----------------|-------------------------------------------------------------------------|------------|------------|------------|------------|------------|-----------|
|                | Day 1                                                                   | Day 2      | Day 3      | Day 4      | Day 5      | Day 6      | Day 7     |
| Blank          | 25 ± 1.33                                                               | 25 ± 1.11  | 0          | 0          | 0          | 0          | 0         |
| Pec-0.1GO      | 90 ± 0.83                                                               | 90 ± 0.83  | 90 ± 0.83  | 90 ± 0.67  | 90 ± 0.86  | 90 ± 0.56  | 90 ± 0.56 |
| Pec-0.05GluGO  | 95 ± 0.56                                                               | 95 ± 0.56  | 95 ± 0.56  | 95 ± 0.86  | 95 ± 1.33  | 95 ± 1.33  | 95 ± 1.33 |
| Pec-0.1GluGO   | 100 ± 0.56                                                              | 100 ± 0.56 | 100 ± 0.86 | 100 ± 0.86 | 100 ± 0.86 | 100 ± 0.86 | 95 ± 1.11 |
| Pec-0.2GluGO   | 100 ± 0.86                                                              | 100 ± 0.86 | 100 ± 0.56 | 100 ± 1.33 | 100 ± 0.83 | 100 ± 0.86 | 90 ± 1.33 |

**Table S 5.** Stability of pectin-based composite beads in Zn<sup>2+</sup> in Figure 11d

| Composite bead | Percentage of remaining composite beads in distilled Zn <sup>2+</sup> , % |            |            |            |            |           |           |
|----------------|---------------------------------------------------------------------------|------------|------------|------------|------------|-----------|-----------|
|                | Day 1                                                                     | Day 2      | Day 3      | Day 4      | Day 5      | Day 6     | Day 7     |
| Blank          | 80 ± 0.83                                                                 | 80 ± 0.83  | 80 ± 0.83  | 80 ± 0.83  | 80 ± 1.33  | 70 ± 0.67 | 0         |
| Pec-0.1GO      | 100 ± 0.56                                                                | 100 ± 0.67 | 100 ± 0.67 | 90 ± 0.83  | 50 ± 0.83  | 0         | 0         |
| Pec-0.05GluGO  | 100 ± 0.67                                                                | 100 ± 0.67 | 100 ± 0.67 | 100 ± 0.83 | 90 ± 0.86  | 90 ± 0.86 | 90 ± 0.86 |
| Pec-0.1GluGO   | 100 ± 0.56                                                                | 100 ± 0.67 | 100 ± 0.56 | 100 ± 1.11 | 100 ± 1.33 | 90 ± 0.56 | 90 ± 0.56 |
| Pec-0.2GluGO   | 100 ± 0.86                                                                | 100 ± 0.86 | 100 ± 1.11 | 100 ± 1.11 | 100 ± 1.33 | 90 ± 1.13 | 90 ± 1.13 |

**Table S 6.** Stability of pectin-based composite beads in Ni<sup>2+</sup> in Figure 11e

| Composite bead | Percentage of remaining composite beads in distilled Ni <sup>2+</sup> , % |            |            |            |            |            |            |
|----------------|---------------------------------------------------------------------------|------------|------------|------------|------------|------------|------------|
|                | Day 1                                                                     | Day 2      | Day 3      | Day 4      | Day 5      | Day 6      | Day 7      |
| Blank          | 70 ± 1.33                                                                 | 0          | 0          | 0          | 0          | 0          | 0          |
| Pec-0.1GO      | 100 ± 0.67                                                                | 30 ± 0.56  | 0          | 0          | 0          | 0          | 0          |
| Pec-0.05GluGO  | 100 ± 0.86                                                                | 30 ± 0.56  | 0          | 0          | 0          | 0          | 0          |
| Pec-0.1GluGO   | 90 ± 0.56                                                                 | 30 ± 0.56  | 0          | 0          | 0          | 0          | 0          |
| Pec-0.2GluGO   | 100 ± 1.33                                                                | 100 ± 1.33 | 100 ± 1.11 | 100 ± 1.11 | 100 ± 1.11 | 100 ± 1.33 | 100 ± 1.33 |

**Table S 7.** Stability of pectin-based composite beads in Cr<sup>6+</sup> in Figure 11f

| Composite bead | Percentage of remaining composite beads in distilled Cr <sup>6+</sup> , % |            |            |            |            |            |            |
|----------------|---------------------------------------------------------------------------|------------|------------|------------|------------|------------|------------|
|                | Day 1                                                                     | Day 2      | Day 3      | Day 4      | Day 5      | Day 6      | Day 7      |
| Blank          | 60 ± 1.11                                                                 | 60 ± 1.33  | 40 ± 0.83  | 0          | 0          | 0          | 0          |
| Pec-0.1GO      | 90 ± 0.83                                                                 | 50 ± 1.33  | 0          | 0          | 0          | 0          | 0          |
| Pec-0.05GluGO  | 100 ± 0.83                                                                | 100 ± 0.83 | 100 ± 1.11 | 100 ± 1.11 | 100 ± 1.11 | 100 ± 1.33 | 90 ± 1.33  |
| Pec-0.1GluGO   | 100 ± 0.56                                                                | 100 ± 0.56 | 100 ± 1.33 | 100 ± 0.83 | 100 ± 0.83 | 100 ± 1.33 | 100 ± 0.56 |
| Pec-0.2GluGO   | 100 ± 1.11                                                                | 100 ± 0.65 | 100 ± 0.87 | 100 ± 0.67 | 100 ± 0.56 | 100 ± 0.56 | 100 ± 0.83 |
